# Supplementary material for: Simultaneous Improvement of Final Product-Tolerance and Thermostability of GH39 Xylosidase for Prebiotic Production by Directed Evolution
Source: MDPI journal article supplement (doi:10.3390/foods11193039), 2022-09-30
Supplement: s1 [file s1]

**Table S1.** The primers used in the study

| Primer  | Sequence (5'-3')                               |
|---------|------------------------------------------------|
| Xyl21F  | TGGTGGACAGCAAATGGGTCGCGGATCCGAATTCATG          |
| Xyl21R  | GTGGGGTGGTGGTGGTGCTCGAGTGCGGCCGC               |
| 16-16F  | CGTTTAATAGACATTGGAAAAAGTGTATTGGAACCG           |
| 16-16R  | CTTTTCCAATGTCTATTAAACGGGATATTGTTATCTCTAGAAATC  |
| 16-94F  | CTTCAGAATAATATACGTCCATTTGTTGAGTTAGGCTTTATG     |
| 16-94R  | CAAATGGACGTATATTATTCTGAAGAAACGTATCGAAAATTCTATC |
| 16-262F | GTGTAAAAAATTTAATTCATGACACACCTTATCCTGACCTTC     |
| 16-262R | CATGAATTAAATTTTTTACACTCGTAAGTTGAGTAAGCATGTC    |
